# Supplementary material for: Identifying Ontarians with Type 2 Diabetes Mellitus in Administrative Data: A Comparison of Two Case Definitions
Source: Springer Nature journal article supplement (doi:10.1007/s13300-024-01535-4), 2024-02-10
Supplement: MOESM1 [file 26721032]

**Identifying Ontarians with type 2 diabetes mellitus in administrative data: A  
comparison of two case definitions**

Robyn L Houlden MD FRCPC,<sup>1</sup> Nilasha Thayalan MD,<sup>1</sup> Scott Shi MBA, PharmD,<sup>2</sup> Atif  
Kukaswadia MSc PhD,<sup>2</sup> Godfrey Mau BScPhm,<sup>3</sup> Aiden Liu MSc<sup>4</sup>

<sup>1</sup>Division of Endocrinology, Queen's University, Kingston, ON, Canada

<sup>2</sup>IQVIA Solutions Canada Inc, Mississauga, ON, Canada

<sup>3</sup>Novo Nordisk Canada Inc, Mississauga, ON, Canada

<sup>4</sup>Novo Nordisk A/S, Bagsværd, Denmark

**Corresponding Author**

Dr. Robyn Houlden

Division of Endocrinology, Queen's University

Kingston, ON, Canada

houldenr@queensu.ca

## **SUPPLEMENTARY FILES**

**Supplementary Table 1. Description of ICES databases**

**Supplementary Table 2. Comorbidity diagnosis codes**

**Supplementary Table 3: Cohort creation**

**Supplementary Table 4. Prevalence of comorbidities**

**Supplementary Table 1. Description of ICES databases**

| Name                                                        | Description                                                                                                                                                                                                                                                                                                                                                                                                                                     |
|-------------------------------------------------------------|-------------------------------------------------------------------------------------------------------------------------------------------------------------------------------------------------------------------------------------------------------------------------------------------------------------------------------------------------------------------------------------------------------------------------------------------------|
| <b>DAD - Discharge Abstract Database</b>                    | Administrative, clinical and demographic information on hospital discharges (including deaths, sign-outs and transfers). <sup>1</sup>                                                                                                                                                                                                                                                                                                           |
| <b>NACRS - National Ambulatory Care Reporting System</b>    | Contains information on emergency department (ED) visits, outpatient and community-based clinics, and same day surgeries. <sup>2</sup>                                                                                                                                                                                                                                                                                                          |
| <b>ODB - Ontario Drug Benefit</b>                           | Provides a record of all influenza vaccinations distributed in an Ontario pharmacy setting. Also includes public coverage of medications for: all persons aged 65+ years; and select groups such as: people living in long-term care home, receiving benefits from Ontario Works or Ontario Disability Support Program, enrolled in the Trillium Drug Program, and individuals <25 years not covered on private insurance (OHIP+). <sup>3</sup> |
| <b>ODD - Ontario Diabetes Dataset</b>                       | ICES-derived cohort that defines Ontarians with diabetes based on their administrative data holdings using a validated algorithm. <sup>4</sup>                                                                                                                                                                                                                                                                                                  |
| <b>OHIP - Ontario Health Insurance Plan Claims Database</b> | Physician billing claims records of all transactions paid for by OHIP, including physician billing claims for administration of influenza vaccinations.                                                                                                                                                                                                                                                                                         |

<sup>1</sup> Canadian Institute for Health Information. Discharge Abstract Database metadata (DAD) 2020 [cited 2020 July 21]. Available from: <https://www.cihi.ca/en/discharge-abstract-database-metadata-dad>

<sup>2</sup> Canadian Institute for Health Information. National Ambulatory Care Reporting System metadata (NACRS) 2020 [cited 2020 July 21]. Available from: <https://www.cihi.ca/en/national-ambulatory-care-reporting-system-metadata-nacrs>.

<sup>3</sup> Government of Ontario. Get coverage for prescription drugs 2020 [cited 2020 July 21]. Available from: <https://www.ontario.ca/page/get-coverage-prescription-drugs>.

<sup>4</sup> Hux JE, Ivis F, Flintoft V, Bica A. Diabetes in Ontario: determination of prevalence and incidence using a validated administrative data algorithm. *Diabetes care*. 2002;25(3):512-6. Epub 2002/03/05. doi: 10.2337/diacare.25.3.512. PubMed PMID: 11874939.

| <b>Name</b>                                                   | <b>Description</b>                                                                                                                                                                                                                |
|---------------------------------------------------------------|-----------------------------------------------------------------------------------------------------------------------------------------------------------------------------------------------------------------------------------|
| <b>OLIS – Ontario<br/>Laboratories<br/>Information System</b> | Contains laboratory test results from specimens submitted as part of routine clinical care, outbreak investigations, or research to 11 Public Health Ontario laboratories and nine academic hospital laboratories across Ontario. |
| <b>RPDB - Registered<br/>Persons Database</b>                 | Demographic information on all individuals with an Ontario Health Card<br>(OHIP card)                                                                                                                                             |

**Supplementary Table 2. Comorbidity diagnosis codes**

| Category                 | Codes         | Description                                                                                                                                                                                                                                                                                                                          |
|--------------------------|---------------|--------------------------------------------------------------------------------------------------------------------------------------------------------------------------------------------------------------------------------------------------------------------------------------------------------------------------------------|
| Type 2 Diabetes Mellitus | ICD-10-CA E11 | <p>Type 2 diabetes mellitus</p> <p><i>Includes:</i> Diabetes (mellitus)(nonobese)(obese):</p> <ul style="list-style-type: none"> <li>• adult-onset</li> <li>• due to insulin secretory defect</li> <li>• insulin resistant</li> <li>• maturity-onset</li> <li>• non insulin dependent diabetes mellitus of young [NIDDMY]</li> </ul> |
| Diabetes Mellitus        | ICD-10-CA E13 | <p>Other specified diabetes mellitus</p> <p><i>Includes:</i> Diabetes mellitus due to genetic defects (in) (of):</p> <ul style="list-style-type: none"> <li>• beta-cell function</li> <li>• insulin action</li> </ul> <p>Maturity onset diabetes of the young [MODY]</p> <p>Steroid induced diabetes mellitus</p>                    |
|                          | ICD-10-CA E14 | <p>Unspecified diabetes mellitus</p> <p><i>Includes:</i> Diabetes mellitus NOS</p>                                                                                                                                                                                                                                                   |
|                          | OHIP 248      | Diabetes Mellitus with Ocular Complications                                                                                                                                                                                                                                                                                          |
|                          | OHIP 250      | Diabetes Mellitus (Including Complications)                                                                                                                                                                                                                                                                                          |
| Type 1 Diabetes Mellitus | ICD-10-CA E10 | <p>Type 1 diabetes mellitus</p> <p><i>Includes:</i> Diabetes (mellitus):</p> <ul style="list-style-type: none"> <li>• autoimmune</li> <li>• brittle</li> <li>• idiopathic</li> </ul>                                                                                                                                                 |

| Category | Codes              | Description                                                                                           |
|----------|--------------------|-------------------------------------------------------------------------------------------------------|
|          |                    | <ul style="list-style-type: none"> <li>• insulin dependent</li> <li>• juvenile onset</li> </ul>       |
|          | ICD-9-CM<br>250.01 | Diabetes mellitus without mention of complication, type I [juvenile type], not stated as uncontrolled |
|          | ICD-9-CM<br>250.03 | Diabetes mellitus without mention of complication, type I [juvenile type], uncontrolled               |
|          | ICD-9-CM<br>250.11 | Diabetes with ketoacidosis, type I [juvenile type], not stated as uncontrolled                        |
|          | ICD-9-CM<br>250.13 | Diabetes with ketoacidosis, type I [juvenile type], uncontrolled                                      |
|          | ICD-9-CM<br>250.21 | Diabetes with hyperosmolarity, type I [juvenile type], not stated as uncontrolled                     |
|          | ICD-9-CM<br>250.23 | Diabetes with hyperosmolarity, type I [juvenile type], uncontrolled                                   |
|          | ICD-9-CM<br>250.31 | Diabetes with other coma, type I [juvenile type], not stated as uncontrolled                          |
|          | ICD-9-CM<br>250.33 | Diabetes with other coma, type I [juvenile type], uncontrolled                                        |
|          | ICD-9-CM<br>250.41 | Diabetes with renal manifestations, type I [juvenile type], not stated as uncontrolled                |
|          | ICD-9-CM<br>250.43 | Diabetes with renal manifestations, type I [juvenile type], uncontrolled                              |
|          | ICD-9-CM<br>250.51 | Diabetes with ophthalmic manifestations, type I [juvenile type], not stated as uncontrolled           |

| Category         | Codes                                                         | Description                                                                                                                                                                                                                                        |
|------------------|---------------------------------------------------------------|----------------------------------------------------------------------------------------------------------------------------------------------------------------------------------------------------------------------------------------------------|
|                  | ICD-9-CM<br>250.53                                            | Diabetes with ophthalmic manifestations, type I [juvenile type], uncontrolled                                                                                                                                                                      |
|                  | ICD-9-CM<br>250.61                                            | Diabetes with neurological manifestations, type I [juvenile type], not stated as uncontrolled                                                                                                                                                      |
|                  | ICD-9-CM<br>250.63                                            | Diabetes with neurological manifestations, type I [juvenile type], uncontrolled                                                                                                                                                                    |
|                  | ICD-9-CM<br>250.71                                            | Diabetes with peripheral circulatory disorders, type I [juvenile type], not stated as uncontrolled                                                                                                                                                 |
|                  | ICD-9-CM<br>250.73                                            | Diabetes with peripheral circulatory disorders, type I [juvenile type], uncontrolled                                                                                                                                                               |
|                  | ICD-9-CM<br>250.81                                            | Diabetes with other specified manifestations, type I [juvenile type], not stated as uncontrolled                                                                                                                                                   |
|                  | ICD-9-CM<br>250.83                                            | Diabetes with other specified manifestations, type I [juvenile type], uncontrolled                                                                                                                                                                 |
|                  | ICD-9-CM<br>250.91                                            | Diabetes with unspecified complication, type I [juvenile type], not stated as uncontrolled                                                                                                                                                         |
|                  | ICD-9-CM<br>250.93                                            | Diabetes with unspecified complication, type I [juvenile type], uncontrolled                                                                                                                                                                       |
| Microalbuminuria | LOINC: 14957-5<br>1754-1<br>XON12400-8<br>14959-1<br>300000-4 | 24h urine collection: 30-300 mg/24h<br>Short-time urine collection: 20-200 mcg/min<br>Spot urine albumin sample: 30-300 mg/L<br>Spot urine albumin/creatinine ratio women: 30-400 mcg/mg<br>Spot urine albumin/creatinine ratio men: 30-300 mcg/mg |

| Category | Codes                                   | Description                                                                                                                                                                                                                                                                                                                                                                                                                                                                                |
|----------|-----------------------------------------|--------------------------------------------------------------------------------------------------------------------------------------------------------------------------------------------------------------------------------------------------------------------------------------------------------------------------------------------------------------------------------------------------------------------------------------------------------------------------------------------|
|          | 32294-1<br>2889-4<br>21482-5<br>34366-5 |                                                                                                                                                                                                                                                                                                                                                                                                                                                                                            |
|          | ICD-10-CA<br>E11.20                     | <p><b>Type 2 diabetes mellitus with incipient diabetic nephropathy (N08.3-*)</b></p> <p><i>Includes:</i> Type 2 diabetes mellitus with:</p> <ul style="list-style-type: none"> <li>• conditions classified in N18.1 - N18.2 (N08.31* - N08.32*)</li> <li>• glomerular basement-membrane thickening</li> <li>• glomerular mesangial expansion</li> <li>• incipient nephropathy (early) (mild) (reversible)</li> <li>• microalbuminuria (constant) (persistent)</li> </ul>                   |
|          | ICD-10-CA<br>E13.20                     | <p><b>Other specified diabetes mellitus with incipient diabetic nephropathy (N08.3-*)</b></p> <p><i>Includes:</i> Other specified diabetes mellitus with:</p> <ul style="list-style-type: none"> <li>• conditions classified in N18.1 - N18.2 (N08.31* - N08.32*)</li> <li>• glomerular basement-membrane thickening</li> <li>• glomerular mesangial expansion</li> <li>• incipient nephropathy (early) (mild) (reversible)</li> <li>• microalbuminuria (constant) (persistent)</li> </ul> |
|          | ICD-10-CA<br>E14.20                     | <p><b>Unspecified diabetes mellitus with incipient diabetic nephropathy (N08.3-*)</b></p> <p><i>Includes:</i> Unspecified diabetes mellitus with:</p>                                                                                                                                                                                                                                                                                                                                      |



| Category           | Codes                                                                                                    | Description                                                                                                                                                                                                                                                                                                                  |
|--------------------|----------------------------------------------------------------------------------------------------------|------------------------------------------------------------------------------------------------------------------------------------------------------------------------------------------------------------------------------------------------------------------------------------------------------------------------------|
|                    |                                                                                                          | <ul style="list-style-type: none"> <li>• conditions classified in N18.1 - N18.2 (N08.31* - N08.32*)</li> <li>• glomerular basement-membrane thickening</li> <li>• glomerular mesangial expansion</li> <li>• incipient nephropathy (early) (mild) (reversible)</li> <li>• microalbuminuria (constant) (persistent)</li> </ul> |
| (Macro)albuminuria | LOINC: 14957-5<br>1754-1<br>XON12400-8<br>14959-1<br>300000-4<br>32294-1<br>2889-4<br>21482-5<br>34366-5 | 24h urine collection: >300 mg/24h<br>Short-time urine collection: >200 mcg/min<br>Spot urine albumin sample: >300 mg/L<br>Spot urine albumin/creatinine ratio women: >400 mcg/mg<br>Spot urine albumin/creatinine ratio men: >300 mcg/mg                                                                                     |
|                    | ICD-10-CA R80                                                                                            | Isolated proteinuria<br><i>Includes:</i> Albuminuria NOS<br>Bence Jones proteinuria<br>Proteinuria NOS                                                                                                                                                                                                                       |
|                    | ICD-10-CA<br>E11.23                                                                                      | Type 2 diabetes mellitus with established or advanced kidney disease (N08.3-*)<br><i>Includes:</i> Type 2 diabetes mellitus with: <ul style="list-style-type: none"> <li>• chronic kidney (renal):</li> </ul>                                                                                                                |

| Category | Codes                                                   | Description                                                                                                                                                                                                                                                                                                                                                                                                                                                                                                                                                   |
|----------|---------------------------------------------------------|---------------------------------------------------------------------------------------------------------------------------------------------------------------------------------------------------------------------------------------------------------------------------------------------------------------------------------------------------------------------------------------------------------------------------------------------------------------------------------------------------------------------------------------------------------------|
|          |                                                         | <ul style="list-style-type: none"> <li>• failure</li> <li>• impairment</li> <li>• conditions classified in N18.3 - N18.5 (N08.33* - N08.35*)</li> <li>• end-stage kidney disease (ESKD)</li> <li>• established diabetic nephropathy</li> <li>• glomerulosclerosis (diffuse) (intracapillary) (nodular)</li> <li>• Kimmelstiel-Wilson (disease) (lesion)</li> <li>• macroalbuminuria</li> <li>• nephropathy (advanced) (progressive) (NOS)</li> <li>• nephrosis</li> <li>• nephrotic syndrome</li> <li>• proteinuria (constant) (persistent)</li> </ul>        |
|          | <p style="text-align: center;">ICD-10-CA<br/>E13.23</p> | <p>Other specified diabetes mellitus with established or advanced kidney disease (N08.3-*)</p> <p>Includes: Other specified diabetes mellitus with:</p> <ul style="list-style-type: none"> <li>• chronic kidney (renal):</li> <li>• failure</li> <li>• impairment</li> <li>• conditions classified in N18.3 - N18.5 (N08.33* - N08.35*)</li> <li>• end-stage kidney disease (ESKD)</li> <li>• established diabetic nephropathy</li> <li>• glomerulosclerosis (diffuse) (intracapillary) (nodular)</li> <li>• Kimmelstiel-Wilson (disease) (lesion)</li> </ul> |

| Category    | Codes                                                   | Description                                                                                                                                                                                                                                                                                                                                                                                                                                                                                                                                                                                                                                                                                                                               |
|-------------|---------------------------------------------------------|-------------------------------------------------------------------------------------------------------------------------------------------------------------------------------------------------------------------------------------------------------------------------------------------------------------------------------------------------------------------------------------------------------------------------------------------------------------------------------------------------------------------------------------------------------------------------------------------------------------------------------------------------------------------------------------------------------------------------------------------|
|             |                                                         | <ul style="list-style-type: none"> <li>• macroalbuminuria</li> <li>• nephropathy (advanced) (progressive) (NOS)</li> <li>• nephrosis</li> <li>• nephrotic syndrome</li> <li>• proteinuria (constant) (persistent)</li> </ul>                                                                                                                                                                                                                                                                                                                                                                                                                                                                                                              |
|             | <p style="text-align: center;">ICD-10-CA<br/>E14.23</p> | <p>Unspecified diabetes mellitus with established or advanced kidney disease (N08.3-*)</p> <p>Includes: Unspecified diabetes mellitus with:</p> <ul style="list-style-type: none"> <li>• chronic kidney (renal):</li> <li>• failure</li> <li>• impairment</li> <li>• conditions classified in N18.3 - N18.5 (N08.33* - N08.35*)</li> <li>• end-stage kidney disease (ESKD)</li> <li>• established diabetic nephropathy</li> <li>• glomerulosclerosis (diffuse) (intracapillary) (nodular)</li> <li>• Kimmelstiel-Wilson (disease) (lesion)</li> <li>• macroalbuminuria</li> <li>• nephropathy (advanced) (progressive) (NOS)</li> <li>• nephrosis</li> <li>• nephrotic syndrome</li> <li>• proteinuria (constant) (persistent)</li> </ul> |
| CKD Stage 1 | <p style="text-align: center;">ICD-10-CA<br/>N08.31</p> | Glomerular disorders in diabetes mellitus, chronic kidney disease, stage 1                                                                                                                                                                                                                                                                                                                                                                                                                                                                                                                                                                                                                                                                |

| Category    | Codes               | Description                                                                                                                                               |
|-------------|---------------------|-----------------------------------------------------------------------------------------------------------------------------------------------------------|
|             |                     | <i>Includes:</i> Kidney damage with normal or increased GFR ([ge ]90 mL/min)                                                                              |
|             | ICD-10-CA<br>N18.1  | Chronic kidney disease, stage 1<br><i>Includes:</i> Kidney damage with normal or increased GFR ([ge ]90 mL/min)                                           |
| CKD Stage 2 | ICD-10-CA<br>N08.32 | Glomerular disorders in diabetes mellitus, chronic kidney disease, stage 2<br><i>Includes:</i> Kidney damage with mild decreased GFR (60-89 mL/min)       |
|             | ICD-10-CA<br>N18.2  | Chronic kidney disease, stage 2<br><i>Includes:</i> Kidney damage with mild decreased GFR (60-89 mL/min)                                                  |
| CKD Stage 3 | ICD-10-CA<br>N08.33 | Glomerular disorders in diabetes mellitus, chronic kidney disease, stage 3<br><i>Includes:</i> Kidney damage with moderately decreased GFR (30-59 mL/min) |
|             | ICD-10-CA<br>N18.3  | Chronic kidney disease, stage 3<br><i>Includes:</i> Kidney damage with moderately decreased GFR (30-59 mL/min)                                            |
| CKD Stage 4 | ICD-10-CA<br>N08.34 | Glomerular disorders in diabetes mellitus, chronic kidney disease, stage 4<br><i>Includes:</i> Kidney damage with severely decreased GFR (15-29 mL/min)   |
|             | ICD-10-CA<br>N18.4  | Chronic kidney disease, stage 4                                                                                                                           |

| Category | Codes               | Description                                                                                                                                                                                                                                                                                                                                                                                                                                                                                 |
|----------|---------------------|---------------------------------------------------------------------------------------------------------------------------------------------------------------------------------------------------------------------------------------------------------------------------------------------------------------------------------------------------------------------------------------------------------------------------------------------------------------------------------------------|
|          |                     | <i>Includes:</i> Kidney damage with severely decreased GFR (15-29 mL/min)                                                                                                                                                                                                                                                                                                                                                                                                                   |
| ESRD     | ICD-10-CA<br>N08.35 | Glomerular disorders in diabetes mellitus, chronic kidney disease, stage 5<br><br><i>Includes:</i> End-stage kidney disease (ESKD)                                                                                                                                                                                                                                                                                                                                                          |
|          | ICD-10-CA<br>N18.5  | Chronic kidney disease, stage 5<br><br><i>Includes:</i> End stage kidney disease: <ul style="list-style-type: none"> <li>• NOS</li> <li>• in allograft failure</li> <li>• on dialysis</li> <li>• without dialysis or transplant</li> </ul> Renal retinitis† (H32.8*)<br><br>Uraemic: <ul style="list-style-type: none"> <li>• apoplexia† (I68.8*)</li> <li>• dementia† (F02.8*)</li> <li>• neuropathy† (G63.8*)</li> <li>• paralysis† (G99.8*)</li> <li>• pericarditis† (I32.8*)</li> </ul> |
|          | ICD-10-CA N19       | <b>Unspecified kidney failure</b><br><br><i>Includes:</i> Renal insufficiency NOS<br><br>Uraemia NOS                                                                                                                                                                                                                                                                                                                                                                                        |
| MI       | ICD-10-CA I21       | Acute myocardial infarction                                                                                                                                                                                                                                                                                                                                                                                                                                                                 |

| Category                       | Codes                                                                      | Description                                                                                                                 |
|--------------------------------|----------------------------------------------------------------------------|-----------------------------------------------------------------------------------------------------------------------------|
|                                |                                                                            | <i>Includes:</i> myocardial infarction specified as acute or with a stated duration of 4 weeks (28 days) or less from onset |
|                                | OHIP 410                                                                   | Myocardial Infarction Acute, Coronary Thrombosis                                                                            |
| Chronic Ischemic Heart Disease | ICD-10-CA I25                                                              | Chronic ischaemic heart disease                                                                                             |
|                                | OHIP 412                                                                   | Old myocardial infarction, chronic coronary artery disease of arteriosclerotic heart disease, without symptoms              |
| Angina                         | ICD-10-CA I20<br>which includes<br>all subcodes<br>(e.g. I20.0,<br>I20.9). | Unstable angina                                                                                                             |
|                                | OHIP 413                                                                   | Acute coronary insufficiency, angina pectoris, acute ischaemic heart disease                                                |
| CHF                            | ICD-10-CA I50                                                              | Heart failure                                                                                                               |
|                                | OHIP 428                                                                   | Congestive Heart Failure                                                                                                    |
|                                | OHIP Q050A                                                                 | Heart Failure Management Incentive (Annual)                                                                                 |
| Dyslipidemia                   | ICD-10-CA E78                                                              | Disorders of lipoprotein metabolism and other lipidaemias                                                                   |
|                                | OHIP 272                                                                   | Hypercholesterolemia                                                                                                        |
| Hypertension                   | ICD-10-CA I10                                                              | Essential (primary) hypertension                                                                                            |
|                                | ICD-10-CA I11                                                              | Hypertensive heart disease                                                                                                  |
|                                | ICD-10-CA I12                                                              | Hypertensive renal disease                                                                                                  |
|                                | ICD-10-CA I13                                                              | Hypertensive heart and renal disease                                                                                        |
|                                | ICD-10-CA I15                                                              | Secondary hypertension                                                                                                      |
|                                | OHIP 401                                                                   | Hypertension, Essential                                                                                                     |

| Category               | Codes                           | Description                                                                                                                      |
|------------------------|---------------------------------|----------------------------------------------------------------------------------------------------------------------------------|
|                        | OHIP 402                        | Hypertensive heart disease                                                                                                       |
|                        | OHIP 403                        | Hypertensive renal disease                                                                                                       |
| Stroke                 | ICD-10-CA I60                   | Subarachnoid haemorrhage                                                                                                         |
|                        | ICD-10-CA I61                   | Intracerebral haemorrhage                                                                                                        |
|                        | ICD-10-CA I63(excluding I63.6)  | Cerebral infarction                                                                                                              |
|                        | ICD-10-CA I64                   | Stroke, not specified as haemorrhage or infarction                                                                               |
|                        | ICD-10- H34.1                   | Central retinal artery occlusion                                                                                                 |
|                        | OHIP 432                        | Intracranial Haemorrhage                                                                                                         |
|                        | OHIP 436                        | Acute cerebrovascular accident, C.V.A., stroke                                                                                   |
| TIA                    | ICD-10-CA G45 (excluding G45.4) | Transient cerebral ischaemic attacks and related syndromes                                                                       |
|                        | ICD-10-CA H34.0                 | Transient retinal artery occlusion                                                                                               |
|                        | OHIP 435                        | Transient cerebral ischaemia                                                                                                     |
| Venous thromboembolism | ICD-10-CA I26                   | Pulmonary embolism                                                                                                               |
|                        | ICD-10-CA I80                   | Phlebitis and thrombophlebitis<br><i>Includes:</i> endophlebitis<br>inflammation, vein<br>periphlebitis<br>suppurative phlebitis |

| Category | Codes               | Description                                                                                                                                                                                                                                                                                                     |
|----------|---------------------|-----------------------------------------------------------------------------------------------------------------------------------------------------------------------------------------------------------------------------------------------------------------------------------------------------------------|
|          | ICD-10-CA I81       | Portal vein thrombosis                                                                                                                                                                                                                                                                                          |
|          | ICD-10-CA I82       | Other venous embolism and thrombosis                                                                                                                                                                                                                                                                            |
|          | OHIP 415            | Pulmonary Embolism, Infarction                                                                                                                                                                                                                                                                                  |
|          | OHIP 451            | Phlebitis, thrombophlebitis                                                                                                                                                                                                                                                                                     |
|          | OHIP 452            | Portal vein thrombosis                                                                                                                                                                                                                                                                                          |
| PVD      | ICD-10-CA<br>E11.50 | Type 2 diabetes mellitus with peripheral angiopathy (I79.2*)<br><br><i>Includes:</i> Type 2 diabetes mellitus with:<br><br><ul style="list-style-type: none"> <li>• intermittent claudication</li> <li>• peripheral vascular disease, unspecified (PVD)</li> <li>• spasm of artery</li> </ul>                   |
|          | ICD-10-CA<br>E11.51 | Type 2 diabetes mellitus with peripheral angiopathy with gangrene (I79.2*)                                                                                                                                                                                                                                      |
|          | ICD-10-CA<br>E13.50 | Other specified diabetes mellitus with peripheral angiopathy (I79.2*)<br><br><i>Includes:</i> Other specified diabetes mellitus with:<br><br><ul style="list-style-type: none"> <li>• intermittent claudication</li> <li>• peripheral vascular disease, unspecified (PVD)</li> <li>• spasm of artery</li> </ul> |
|          | ICD-10-CA<br>E13.51 | Other specified diabetes mellitus with peripheral angiopathy with gangrene (I79.2*)                                                                                                                                                                                                                             |
|          | ICD-10-CA<br>E14.50 | Unspecified diabetes mellitus with peripheral angiopathy (I79.2*)<br><br><i>Includes:</i> Unspecified diabetes mellitus with:                                                                                                                                                                                   |



| Category | Codes               | Description                                                                                                                                                                                          |
|----------|---------------------|------------------------------------------------------------------------------------------------------------------------------------------------------------------------------------------------------|
|          |                     | <ul style="list-style-type: none"> <li>• intermittent claudication</li> <li>• peripheral vascular disease, unspecified (PVD)</li> <li>• spasm of artery</li> </ul>                                   |
|          | ICD-10-CA<br>E14.51 | Unspecified diabetes mellitus with peripheral angiopathy with gangrene (I79.2*)                                                                                                                      |
|          | ICD-10-CA<br>I70.2  | Atherosclerosis of arteries of extremities<br><br><i>Includes:</i> Atherosclerosis of (autologous) (bypass) (nonautologous) grafts of arteries of extremities<br><br>Mönckeberg's (medial) sclerosis |
|          | ICD-10-CA<br>I73.9  | Peripheral vascular disease, unspecified<br><br><i>Includes:</i> Intermittent claudication<br><br>Spasm of artery                                                                                    |
|          | ICD-10-CA<br>I74.2  | Embolism and thrombosis of arteries of upper extremities                                                                                                                                             |
|          | ICD-10-CA<br>I74.3  | Embolism and thrombosis of arteries of lower extremities                                                                                                                                             |
|          | ICD-10-CA<br>I74.4  | Embolism and thrombosis of arteries of extremities, unspecified<br><br><i>Includes:</i> Peripheral arterial embolism                                                                                 |
|          | ICD-10-CA<br>I79.2  | Peripheral angiopathy in diseases classified elsewhere<br><br><i>Includes:</i> Diabetic peripheral angiopathy (E10-E14† with common fourth character .5)                                             |
|          | OHIP 443            | Raynaud's disease, Buerger's disease, peripheral vascular disease, intermittent claudication                                                                                                         |

| Category                   | Codes            | Description                                                                                                                                                                                                                                                                                                                                                                                                                                                                                                         |
|----------------------------|------------------|---------------------------------------------------------------------------------------------------------------------------------------------------------------------------------------------------------------------------------------------------------------------------------------------------------------------------------------------------------------------------------------------------------------------------------------------------------------------------------------------------------------------|
| Obesity                    | ICD-10-CA E66    | Obesity                                                                                                                                                                                                                                                                                                                                                                                                                                                                                                             |
|                            | OHIP 278         | Obesity                                                                                                                                                                                                                                                                                                                                                                                                                                                                                                             |
| Lower Extremity Amputation | OHIP R520        | Amputation - Metatarsal/phalanx disarticulation                                                                                                                                                                                                                                                                                                                                                                                                                                                                     |
|                            | OHIP E585        | Amputation - Metatarsal/phalanx disarticulation -each additional                                                                                                                                                                                                                                                                                                                                                                                                                                                    |
|                            | OHIP R621        | Amputation - Ray (single)                                                                                                                                                                                                                                                                                                                                                                                                                                                                                           |
|                            | OHIP R623        | Amputation - Symes                                                                                                                                                                                                                                                                                                                                                                                                                                                                                                  |
|                            | OHIP R622        | Amputation - Transmetatarsal/transtarsal                                                                                                                                                                                                                                                                                                                                                                                                                                                                            |
|                            | OHIP R619        | Amputation - Terminal Symes                                                                                                                                                                                                                                                                                                                                                                                                                                                                                         |
| Autonomic neuropathy       | ICD-10-CA E11.42 | Type 2 diabetes mellitus with autonomic neuropathy (G99.0*)<br><br><i>Includes:</i> Type 2 Diabetes mellitus with autonomic mononeuropathy/polyneuropathy:<br><br><ul style="list-style-type: none"> <li>• abnormal sweating (gustatory)</li> <li>• anorectal dysfunction</li> <li>• diarrhea (functional)</li> <li>• erectile failure (impotence)</li> <li>• gastroparesis</li> <li>• hypotonic bladder</li> <li>• neuropathic edema</li> <li>• oesophageal dysfunction</li> <li>• postural hypotension</li> </ul> |
|                            | ICD-10-CA E13.42 | Other specified diabetes mellitus with autonomic neuropathy (G99.0*)                                                                                                                                                                                                                                                                                                                                                                                                                                                |

| Category | Codes                       | Description                                                                                                                                                                                                                                                                                                                                                                                                                                                                                   |
|----------|-----------------------------|-----------------------------------------------------------------------------------------------------------------------------------------------------------------------------------------------------------------------------------------------------------------------------------------------------------------------------------------------------------------------------------------------------------------------------------------------------------------------------------------------|
|          |                             | <p><i>Includes:</i> Other specified diabetes mellitus with autonomic mononeuropathy/polyneuropathy:</p> <ul style="list-style-type: none"> <li>• abnormal sweating (gustatory)</li> <li>• anorectal dysfunction</li> <li>• diarrhea (functional)</li> <li>• erectile failure (impotence)</li> <li>• gastroparesis</li> <li>• hypotonic bladder</li> <li>• neuropathic edema</li> <li>• oesophageal dysfunction</li> <li>• postural hypotension</li> </ul>                                     |
|          | <p>ICD-10-CA<br/>E14.42</p> | <p>Unspecified diabetes mellitus with autonomic neuropathy (G99.0*)</p> <p><i>Includes:</i> Unspecified diabetes mellitus with autonomic mononeuropathy/polyneuropathy:</p> <ul style="list-style-type: none"> <li>• abnormal sweating (gustatory)</li> <li>• anorectal dysfunction</li> <li>• diarrhea (functional)</li> <li>• erectile failure (impotence)</li> <li>• gastroparesis</li> <li>• hypotonic bladder</li> <li>• neuropathic edema</li> <li>• oesophageal dysfunction</li> </ul> |

| Category    | Codes              | Description                                                                                                                                                                                   |
|-------------|--------------------|-----------------------------------------------------------------------------------------------------------------------------------------------------------------------------------------------|
|             |                    | • postural hypotension                                                                                                                                                                        |
| Retinopathy | ICD-10-CA<br>E11.3 | Type 2 diabetes mellitus with ophthalmic complications                                                                                                                                        |
|             | ICD-10-CA<br>E13.3 | Other specified diabetes mellitus with ophthalmic complications                                                                                                                               |
|             | ICD-10-CA<br>E14.3 | Unspecified diabetes mellitus with ophthalmic complications                                                                                                                                   |
|             | ICD-10-CA<br>H36.0 | Diabetic retinopathy                                                                                                                                                                          |
| Depression  | ICD-10-CA F32      | Depressive episode                                                                                                                                                                            |
|             | ICD-10-CA F33      | Recurrent depressive disorder                                                                                                                                                                 |
|             | ICD-10-CA<br>R45.2 | Unhappiness<br><br><i>Includes:</i> Depression, not yet clinically diagnosed<br><br>Feeling depressed<br><br>Sadness<br><br>Worries NOS                                                       |
|             | OHIP 311           | Depressive or Other Non-psychotic Disorder, Not Classified<br>Elsewhere                                                                                                                       |
| Cirrhosis   | K74                | Fibrosis and cirrhosis of liver<br><br><i>Excludes:</i> alcoholic fibrosis of liver (K70.2)<br><br>cardiac sclerosis of liver (K76.1)<br><br>cirrhosis (of liver):<br><br>• alcoholic (K70.3) |

| Category | Codes    | Description                                                    |
|----------|----------|----------------------------------------------------------------|
|          |          | • congenital (P78.80)<br>with toxic liver disease (K71.7)      |
|          | OHIP 571 | Alcoholic cirrhosis, biliary cirrhosis, cirrhosis of the liver |

**Supplementary Table 3: Cohort creation**

|                                                        | <b>Specific</b> | <b>Sensitive</b>  |
|--------------------------------------------------------|-----------------|-------------------|
| <b>Inclusion Criteria</b>                              |                 |                   |
| ODD with HbA1c                                         | N=938,952       | N=1,265,329       |
| <b>Exclusion Criteria</b>                              |                 |                   |
| T1DM                                                   | 145,872 (15.5%) | 150,461 (11.9%)   |
| Age <15 at ODD case detection                          | 1,714 (0.2%)    | 1,978 (0.2%)      |
| Age <30 at index date                                  | 4,360 (0.5%)    | 10,809 (0.9%)     |
| OHIP ineligible at index or any of previous 4 quarters | 3,765 (0.4%)    | 8,254 (0.7%)      |
| Died before index                                      | 13 (0.0%)       | 15 (0.0%)         |
| Included in cohort                                     | 783,228 (83.4%) | 1,093,812 (86.4%) |

ODD, Ontario Diabetes Database; OHIP, Ontario Health Insurance Plan; T1DM, type 1 diabetes

**Supplementary Table 4. Prevalence of comorbidities**

|                                      | <b>Specific</b> | <b>Sensitive</b> |
|--------------------------------------|-----------------|------------------|
| Patient count, n                     | 783,228         | 1,093,812        |
| Autonomic neuropathy (n,%)           | 2,798 (0.4%)    | 2,965 (0.3%)     |
| Congestive heart failure (n,%)       | 84,962 (10.8%)  | 114,590 (10.5%)  |
| Chronic ischemic heart disease (n,%) | 222,435 (28.4%) | 299,469 (27.4%)  |
| Cirrhosis (n,%)                      | 14,279 (1.8%)   | 19,245 (1.8%)    |
| Depression (n,%)                     | 117,344 (15.0%) | 170,599 (15.6%)  |
| Dyslipidemia (n,%)                   | 430,592 (55.0%) | 596,048 (54.5%)  |
| End stage renal disease (n,%)        | 11,972 (1.5%)   | 15,598 (1.4%)    |
| Hypertension (n,%)                   | 624,899 (79.8%) | 845,747 (77.3%)  |
| Lower extremity amputation (n,%)     | 1,505 (0.2%)    | 1,697 (0.2%)     |
| Macroalbuminuria (n,%)               | 54,813 (7.0%)   | 62,039 (5.7%)    |
| Myocardial infarction (n,%)          | 65,804 (8.4%)   | 90,555 (8.3%)    |
| Microalbuminuria (n,%)               | 175,381 (22.4%) | 317,430 (29.0%)  |
| Obesity (n,%)                        | 166,449 (21.3%) | 232,060 (21.2%)  |
| Peripheral vascular disease (n,%)    | 50,744 (6.5%)   | 66,780 (6.1%)    |
| Retinopathy (n,%)                    | 28,631 (3.7%)   | 30,413 (2.8%)    |
| Stroke (n,%)                         | 67,677 (8.6%)   | 92,956 (8.5%)    |
| Transient ischemic attack (n,%)      | 45,464 (5.8%)   | 62,391 (5.7%)    |
| Unstable angina (n,%)                | 169,053 (21.6%) | 228,832 (20.9%)  |
| Venous thromboembolism (n,%)         | 54,862 (7.0%)   | 77,118 (7.1%)    |
